# Supplementary material for: DoliClock: a lipid-based aging clock reveals accelerated aging in neurological disorders
Source: publisher site journal article supplement (doi:10.18632/aging.206266), 2025-06-04
Supplement: Supplementary file [file aging-v17-206266-supplementary-material-SD1.pdf]

SUPPLEMENTARY FIGURES

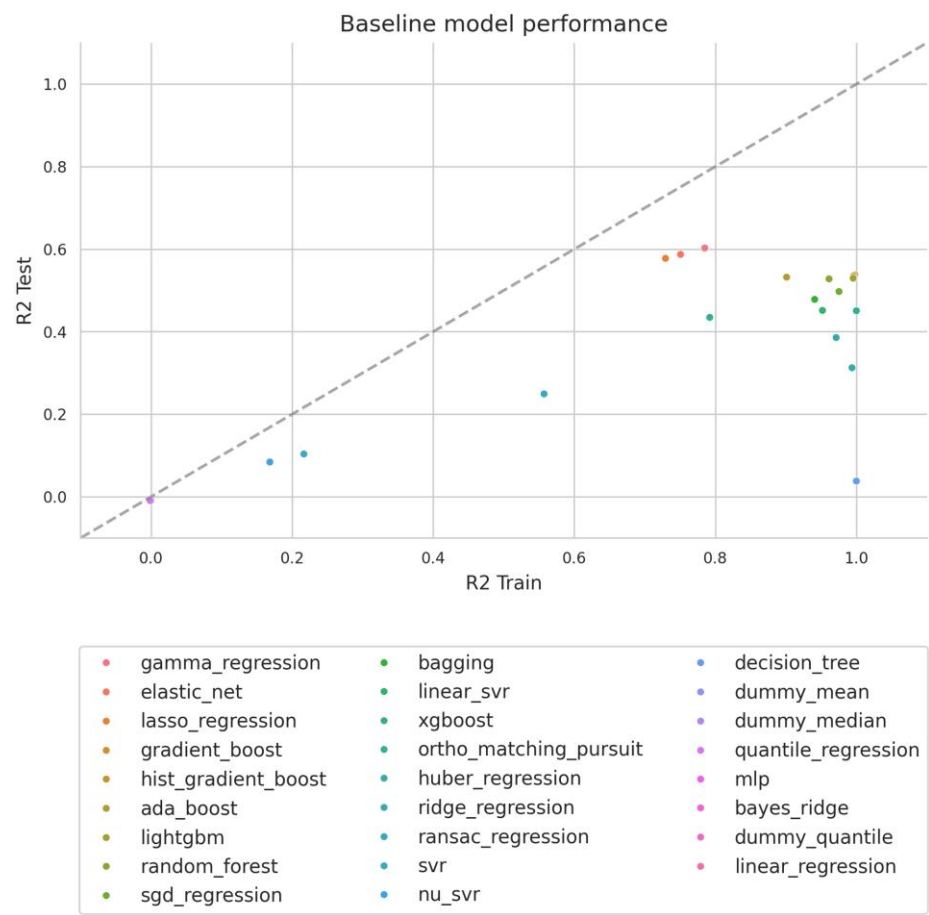

**Supplementary Figure 1. Comparison of 26 models based on their  $R^2$  test score versus training score.** Each point represents a model, illustrating its performance on both the training and test datasets.

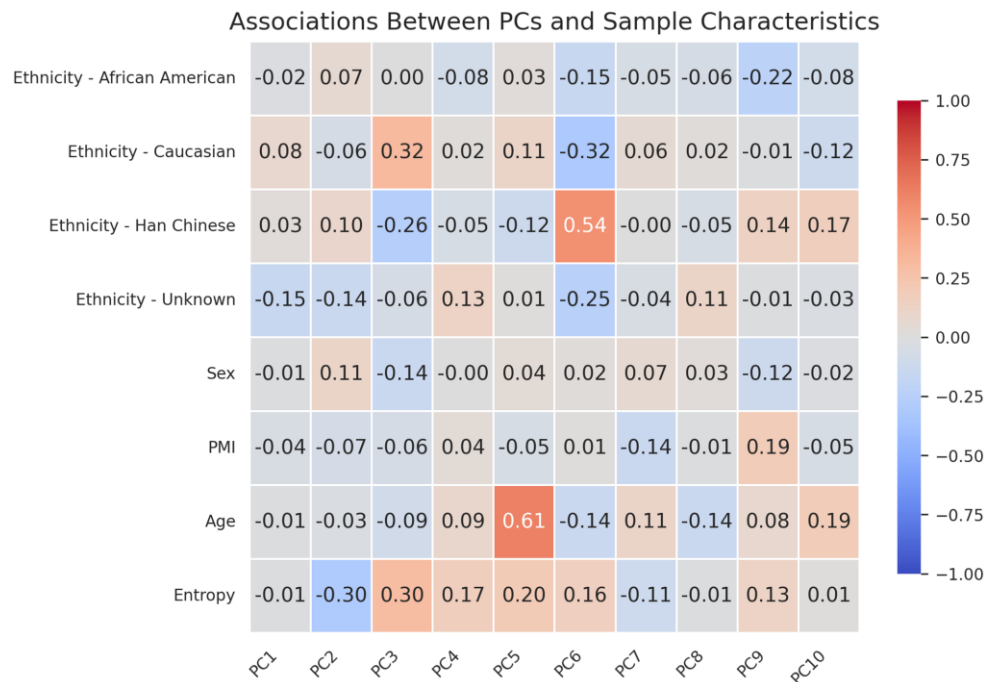

**Supplementary Figure 2. Correlation heatmap of principal components and metadata from the individuals.** The Pearson correlation coefficient was used to calculate correlation. Warmer colors indicate positive correlations, whereas cooler colors indicate negative correlations.

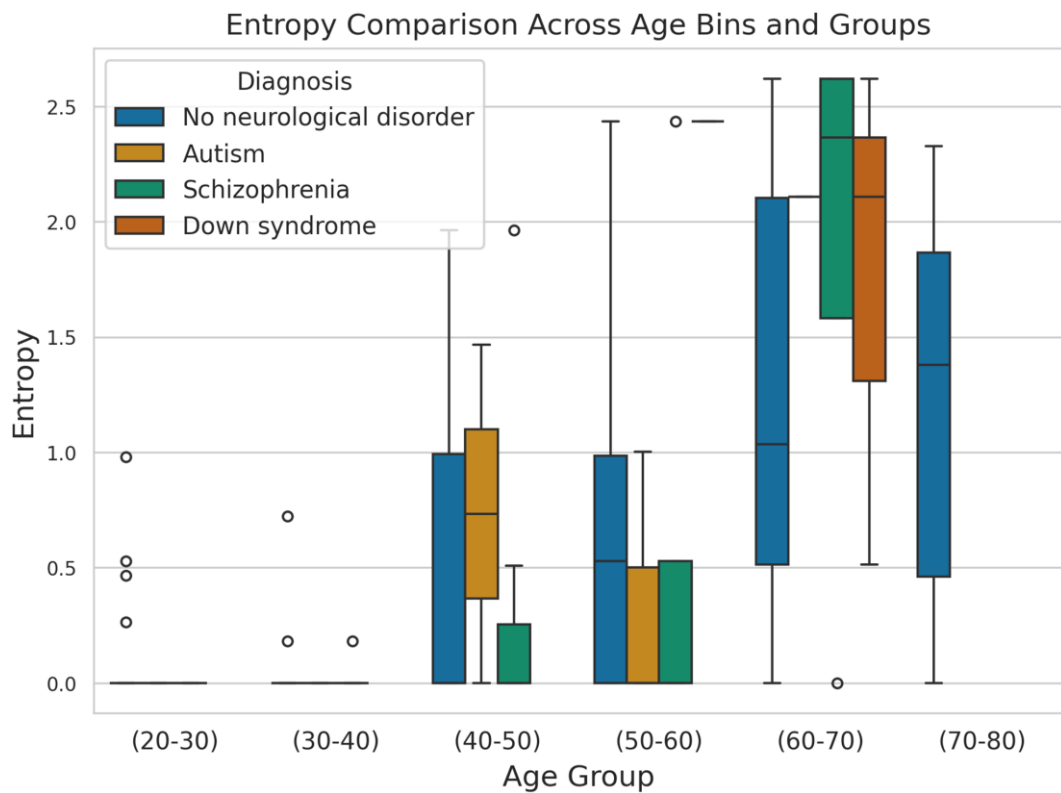

**Supplementary Figure 3. Sample-wise entropy across neurological conditions and age groups.** Boxplots of sample-wise entropy values for samples without neurological disorder, and for samples with autism spectrum disorder, schizophrenia, and Down syndrome stratified by age (only significant *P*-values are annotated: *P* < 0.05 = \*, *P* < 0.01 = \*\*, *P* < 0.001 = \*\*\*).

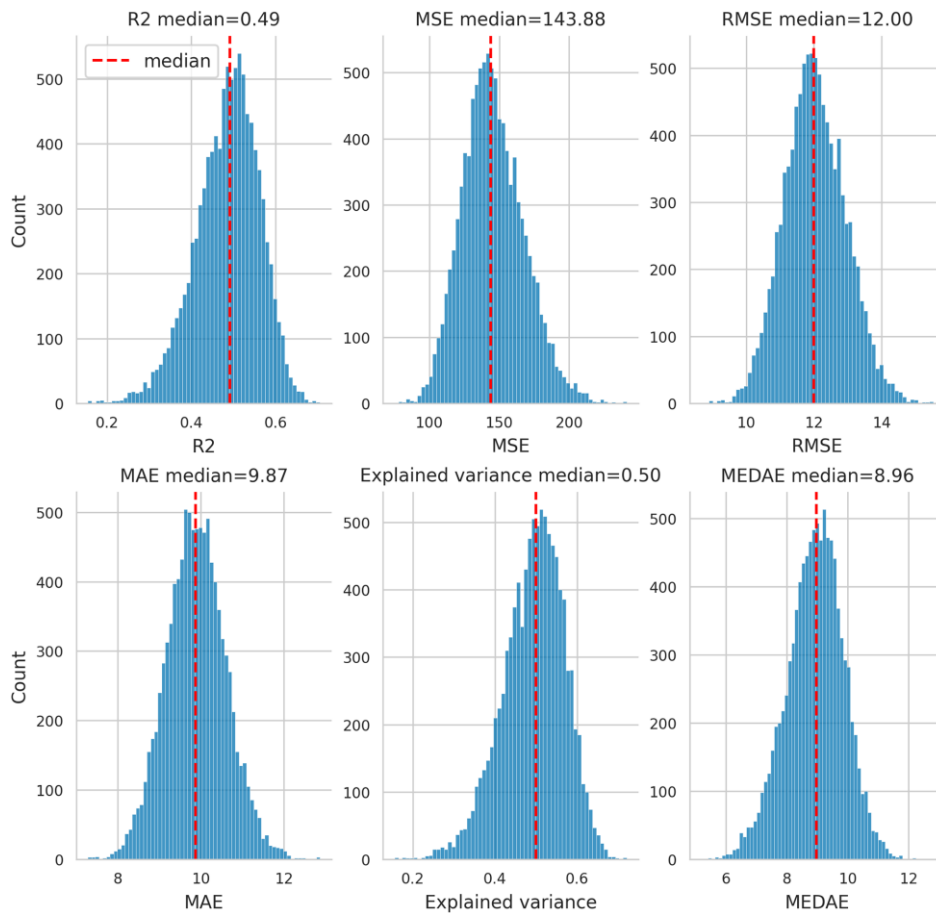

**Supplementary Figure 4. Distribution of all model scores, with the median value indicated.**

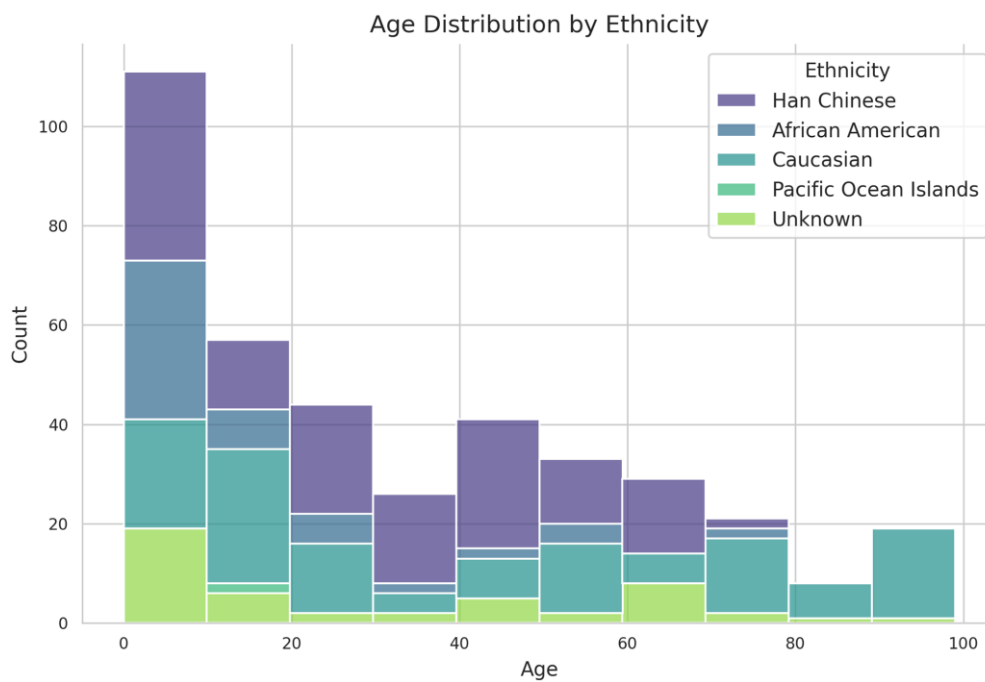

**Supplementary Figure 5. Histogram showing the age distribution across different ethnicities.** Age is divided into bins of 10 years, and each ethnicity is represented by a distinct color to highlight demographic variation within the dataset.

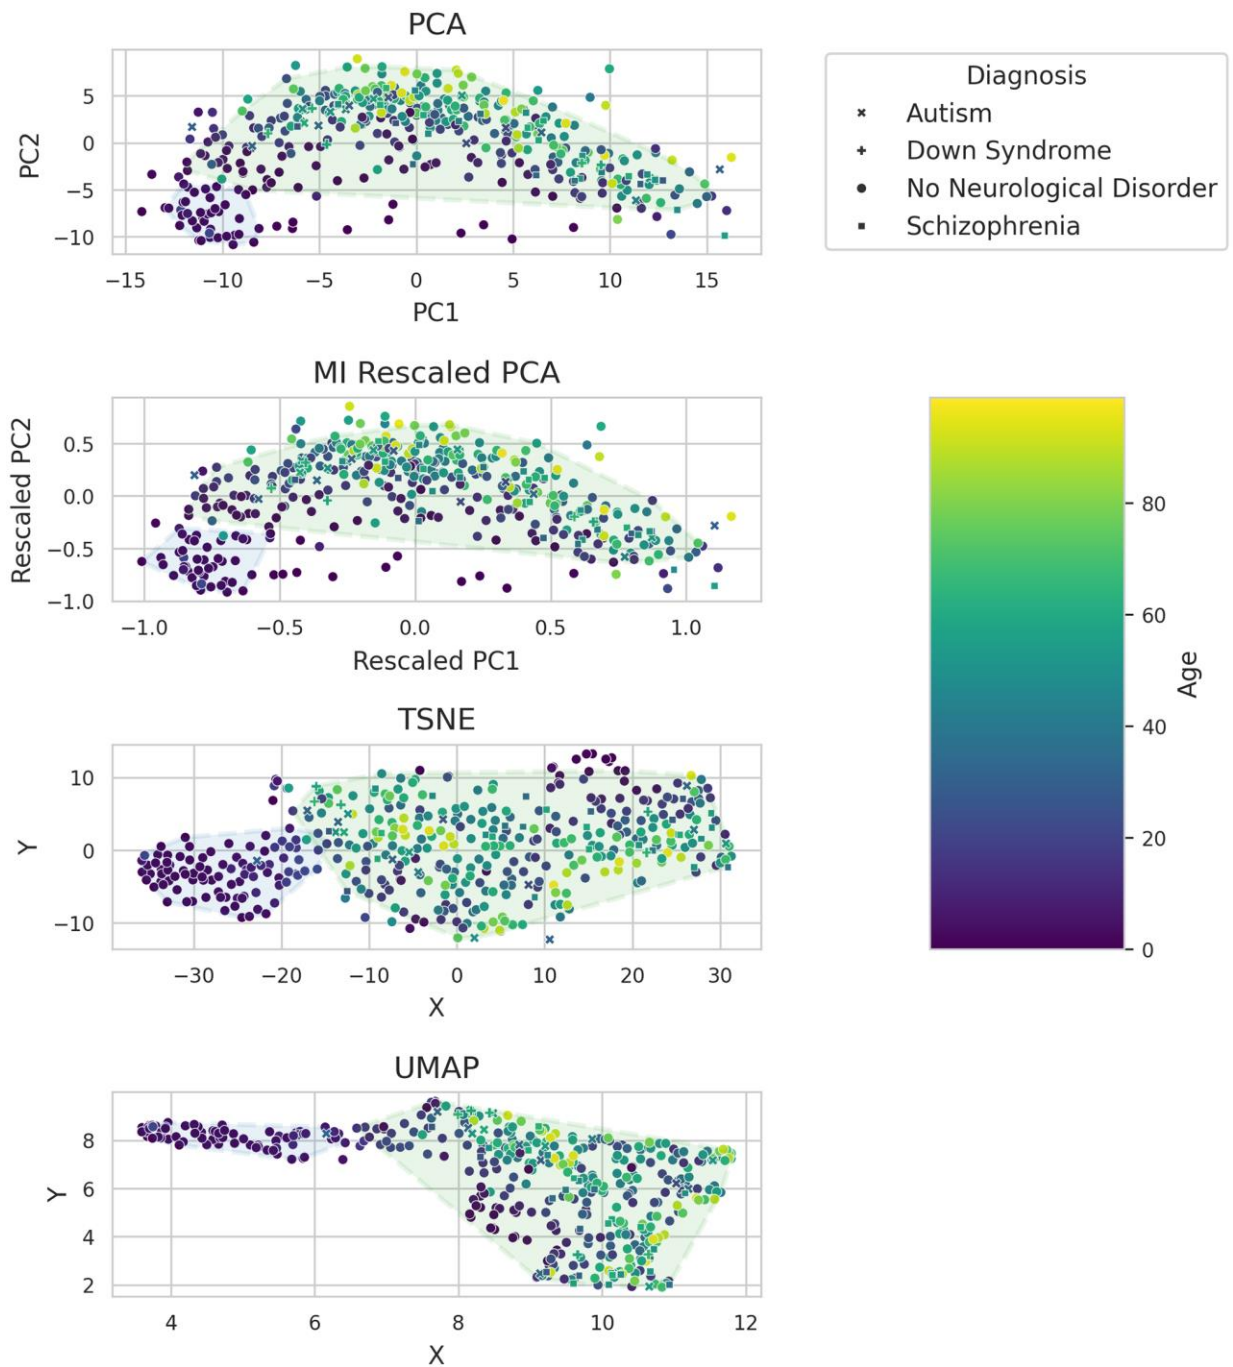

**Supplementary Figure 6. Scatter plots illustrating dimensionality reduction techniques applied to the dataset.** Clusters were identified using DBScan and visualized with convex hulls. The figure presents PCA, PCA with Mutual Information (MI) rescaling, t-SNE, and UMAP, each displaying sample clustering based on all lipid species. The axes represent the first two dimensions of each respective method.

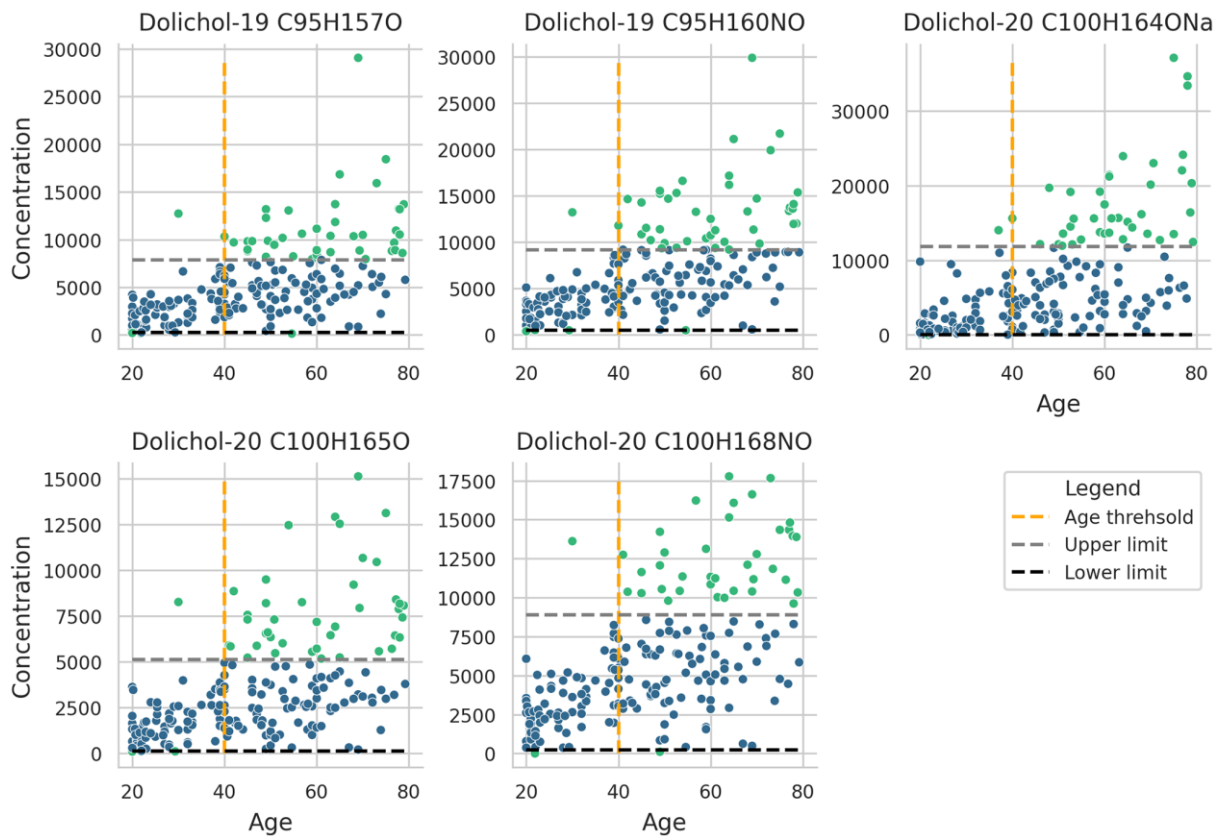

**Supplementary Figure 7. Age-related variability in dolichol distributions.** Each plot visualizes lipid distributions relative to a reference group (ages 20–40), standardized using Yeo-Johnson transformation. Individuals marked in blue have lipid profiles within two standard deviations of the reference distribution, while individuals marked in green deviate beyond this threshold.
